# Supplementary material
Source: PubMed Central journal article supplement (PMC10148821)
Supplement: 41467_2023_38202_MOESM10_ESM.pdf [file 41467_2023_38202_MOESM10_ESM.pdf]

## Reporting Summary

Nature Portfolio wishes to improve the reproducibility of the work that we publish. This form provides structure for consistency and transparency in reporting. For further information on Nature Portfolio policies, see our [Editorial Policies](#) and the [Editorial Policy Checklist](#).

### Statistics

For all statistical analyses, confirm that the following items are present in the figure legend, table legend, main text, or Methods section.

n/a Confirmed

- |                                     |                                     |                                                                                                                                                                                                                                                            |
|-------------------------------------|-------------------------------------|------------------------------------------------------------------------------------------------------------------------------------------------------------------------------------------------------------------------------------------------------------|
| <input type="checkbox"/>            | <input checked="" type="checkbox"/> | The exact sample size ( $n$ ) for each experimental group/condition, given as a discrete number and unit of measurement                                                                                                                                    |
| <input checked="" type="checkbox"/> | <input type="checkbox"/>            | A statement on whether measurements were taken from distinct samples or whether the same sample was measured repeatedly                                                                                                                                    |
| <input checked="" type="checkbox"/> | <input type="checkbox"/>            | The statistical test(s) used AND whether they are one- or two-sided<br><i>Only common tests should be described solely by name; describe more complex techniques in the Methods section.</i>                                                               |
| <input checked="" type="checkbox"/> | <input type="checkbox"/>            | A description of all covariates tested                                                                                                                                                                                                                     |
| <input checked="" type="checkbox"/> | <input type="checkbox"/>            | A description of any assumptions or corrections, such as tests of normality and adjustment for multiple comparisons                                                                                                                                        |
| <input checked="" type="checkbox"/> | <input type="checkbox"/>            | A full description of the statistical parameters including central tendency (e.g. means) or other basic estimates (e.g. regression coefficient) AND variation (e.g. standard deviation) or associated estimates of uncertainty (e.g. confidence intervals) |
| <input checked="" type="checkbox"/> | <input type="checkbox"/>            | For null hypothesis testing, the test statistic (e.g. $F$ , $t$ , $r$ ) with confidence intervals, effect sizes, degrees of freedom and $P$ value noted<br><i>Give <math>P</math> values as exact values whenever suitable.</i>                            |
| <input checked="" type="checkbox"/> | <input type="checkbox"/>            | For Bayesian analysis, information on the choice of priors and Markov chain Monte Carlo settings                                                                                                                                                           |
| <input checked="" type="checkbox"/> | <input type="checkbox"/>            | For hierarchical and complex designs, identification of the appropriate level for tests and full reporting of outcomes                                                                                                                                     |
| <input checked="" type="checkbox"/> | <input type="checkbox"/>            | Estimates of effect sizes (e.g. Cohen's $d$ , Pearson's $r$ ), indicating how they were calculated                                                                                                                                                         |

Our web collection on [statistics for biologists](#) contains articles on many of the points above.

### Software and code

Policy information about [availability of computer code](#)

Data collection no software was used

Data analysis Fastp v0.23.1; BWA-MEM v0.7.17; Megahit v1.2.9; BLASTn v2.7.1; DIAMOND v0.8.28.90; Bowtie 2 v2.4.4; TaxonKit v0.2.4; coronaSPAdes v3.15.0; Geneious v2021.2.2; Samtools v1.9; MAFFT v7.407; MEGA v7.0.26; trimAI v1.4.rev15; IQ-Tree v2.0.3; Simplot v3.5.1; RDP v4.97.

For manuscripts utilizing custom algorithms or software that are central to the research but not yet described in published literature, software must be made available to editors and reviewers. We strongly encourage code deposition in a community repository (e.g. GitHub). See the Nature Portfolio [guidelines for submitting code & software](#) for further information.

### Data

Policy information about [availability of data](#)

All manuscripts must include a [data availability statement](#). This statement should provide the following information, where applicable:

- Accession codes, unique identifiers, or web links for publicly available datasets
- A description of any restrictions on data availability
- For clinical datasets or third party data, please ensure that the statement adheres to our [policy](#)

Sequence reads generated in this study are available from the NCBI Sequence Read Archive (SRA) database under BioProject accession number PRJNA901878. The complete genome sequences of five tiger PRVs, one porcupine PRV, one lion parvovirus, one pangolin pestivirus have been deposited into GenBank under accession numbers OP727800-OP727805, OP745049 and OP868576. Assembled sequences were deposited into GenBank under accession numbers OP094593-OP094596, OP860308-OP860416, OP930871-OP930878, OP950229-OP950235, OQ236110-OQ236157, OQ297692-OQ297732, OQ348136-OQ348167, OQ363494-OQ363515,

## Human research participants

Policy information about [studies involving human research participants and Sex and Gender in Research](#).

|                             |    |
|-----------------------------|----|
| Reporting on sex and gender | NA |
| Population characteristics  | NA |
| Recruitment                 | NA |
| Ethics oversight            | NA |

Note that full information on the approval of the study protocol must also be provided in the manuscript.

## Field-specific reporting

Please select the one below that is the best fit for your research. If you are not sure, read the appropriate sections before making your selection.

- Life sciences  Behavioural & social sciences  Ecological, evolutionary & environmental sciences

For a reference copy of the document with all sections, see [nature.com/documents/nr-reporting-summary-flat.pdf](https://www.nature.com/documents/nr-reporting-summary-flat.pdf)

## Life sciences study design

All studies must disclose on these points even when the disclosure is negative.

|                 |                                                                                                                                                                                                                                                                                                                                                                                                                                                                                                                                                                                                                                                                                                                                                                                                                                                                                                                                                                                                                                                                                                                                                                                                                                                                                                                                                                                                                                                                                                                                                                                                                                                                                                                               |
|-----------------|-------------------------------------------------------------------------------------------------------------------------------------------------------------------------------------------------------------------------------------------------------------------------------------------------------------------------------------------------------------------------------------------------------------------------------------------------------------------------------------------------------------------------------------------------------------------------------------------------------------------------------------------------------------------------------------------------------------------------------------------------------------------------------------------------------------------------------------------------------------------------------------------------------------------------------------------------------------------------------------------------------------------------------------------------------------------------------------------------------------------------------------------------------------------------------------------------------------------------------------------------------------------------------------------------------------------------------------------------------------------------------------------------------------------------------------------------------------------------------------------------------------------------------------------------------------------------------------------------------------------------------------------------------------------------------------------------------------------------------|
| Sample size     | <p>For metatranscriptome sequencing, because different individuals may carry different viruses, all available samples were used in this study to obtain as much virus data as possible. Tissues, blood, feces or pharyngeal/anal swabs of 1497 bats, 363 rodents, 58 pikas, 18 pangolins, 45 insectivorous animals and 194 zoo animals were used.</p> <p>To determine the pathogenicity and the potential zoonotic potential of the tiger-isolated PRV (FJ/tiger/2015), cats, dogs and pigs were used. For each animal species, six animals that were negative to PRV were divided into the infected group (three animals) and the control group (three animals). To determine the pathogenicity of the pangolin pestivirus (strain P42), mice, rats, guinea pigs, rabbits and pigs were chosen. Six animals for each species were divided into the infected group (three animals) and the control group (three animals). For these experiments, both the infected group and the control group had three animal individuals for each experiment. Therefore, each experiment had three repetitions to reduce experimental errors.</p> <p>To determine the pathogenicity of the FPV isolated from a lion, four cats that were negative to FPV were divided into the infected group (three animals) and the control group (one animal). In this experiment, the infected group had three animal individuals, and thus had three repetitions to reduce experimental errors. Considering that the PRV infection experiment showed that the three cats in the control group did not show any pathological changes, in order to reduce the number of sacrificed animals, a cat was used as the control group in this experiment.</p> |
| Data exclusions | No data were excluded                                                                                                                                                                                                                                                                                                                                                                                                                                                                                                                                                                                                                                                                                                                                                                                                                                                                                                                                                                                                                                                                                                                                                                                                                                                                                                                                                                                                                                                                                                                                                                                                                                                                                                         |
| Replication     | For each experimental infections, three animals were used and had similar results. qPCR was performed to detect their infection of viruses. Known positive and negative controls were used throughout, and all assays were performed in triplicate. Transmission electron microscopy and histopathological examination were also performed in triplicate to verify the reproducibility of the experimental findings.                                                                                                                                                                                                                                                                                                                                                                                                                                                                                                                                                                                                                                                                                                                                                                                                                                                                                                                                                                                                                                                                                                                                                                                                                                                                                                          |
| Randomization   | For experimental infections, animals were divided into the infected and the control groups randomly.                                                                                                                                                                                                                                                                                                                                                                                                                                                                                                                                                                                                                                                                                                                                                                                                                                                                                                                                                                                                                                                                                                                                                                                                                                                                                                                                                                                                                                                                                                                                                                                                                          |
| Blinding        | Animals in the infected group and the control group were in different cages. One group of investigators inoculated the animals of the infected group with viruses, therefore, they were not blinded to group allocation. The tissues or swabs of these animals were collected and numbered by this group of investigators. Viral DNA/RNA was detected from these numbered samples by another groups of the investigators who were blind to group allocation. Therefore, the first group of investigators were not blind to group allocation did not influence our results.                                                                                                                                                                                                                                                                                                                                                                                                                                                                                                                                                                                                                                                                                                                                                                                                                                                                                                                                                                                                                                                                                                                                                    |

## Reporting for specific materials, systems and methods

We require information from authors about some types of materials, experimental systems and methods used in many studies. Here, indicate whether each material, system or method listed is relevant to your study. If you are not sure if a list item applies to your research, read the appropriate section before selecting a response.

## Materials &amp; experimental systems

|                                     |                                                                 |
|-------------------------------------|-----------------------------------------------------------------|
| n/a                                 | Involvement in the study                                        |
| <input checked="" type="checkbox"/> | <input type="checkbox"/> Antibodies                             |
| <input type="checkbox"/>            | <input checked="" type="checkbox"/> Eukaryotic cell lines       |
| <input checked="" type="checkbox"/> | <input type="checkbox"/> Palaeontology and archaeology          |
| <input type="checkbox"/>            | <input checked="" type="checkbox"/> Animals and other organisms |
| <input checked="" type="checkbox"/> | <input type="checkbox"/> Clinical data                          |
| <input checked="" type="checkbox"/> | <input type="checkbox"/> Dual use research of concern           |

## Methods

|                                     |                                                 |
|-------------------------------------|-------------------------------------------------|
| n/a                                 | Involvement in the study                        |
| <input checked="" type="checkbox"/> | <input type="checkbox"/> ChIP-seq               |
| <input checked="" type="checkbox"/> | <input type="checkbox"/> Flow cytometry         |
| <input checked="" type="checkbox"/> | <input type="checkbox"/> MRI-based neuroimaging |

## Eukaryotic cell lines

Policy information about [cell lines and Sex and Gender in Research](#)

|                                                                      |                                                                                                                                                                       |
|----------------------------------------------------------------------|-----------------------------------------------------------------------------------------------------------------------------------------------------------------------|
| Cell line source(s)                                                  | MDBK, ATCC, VA, United States;<br>VERO-E6, ATCC, VA, United States;<br>PK-15, ATCC, VA, United States;<br>A549, ATCC, VA, United States;<br>F81, KCB, Kunming, China. |
| Authentication                                                       | STR DNA Profiling                                                                                                                                                     |
| Mycoplasma contamination                                             | All cell lines tested negative for mycoplasma contamination.                                                                                                          |
| Commonly misidentified lines<br>(See <a href="#">ICLAC</a> register) | NA                                                                                                                                                                    |

## Animals and other research organisms

Policy information about [studies involving animals; ARRIVE guidelines](#) recommended for reporting animal research, and [Sex and Gender in Research](#)

|                         |                                                                                                                                                                                                                                                                                                                                                                                                                                                                                                                                                                                                                                                                                                                                                                                                                                                                                                                                                                                                                                                                                                                                                                                                                                                                                                                                                                                                                                                                                                    |
|-------------------------|----------------------------------------------------------------------------------------------------------------------------------------------------------------------------------------------------------------------------------------------------------------------------------------------------------------------------------------------------------------------------------------------------------------------------------------------------------------------------------------------------------------------------------------------------------------------------------------------------------------------------------------------------------------------------------------------------------------------------------------------------------------------------------------------------------------------------------------------------------------------------------------------------------------------------------------------------------------------------------------------------------------------------------------------------------------------------------------------------------------------------------------------------------------------------------------------------------------------------------------------------------------------------------------------------------------------------------------------------------------------------------------------------------------------------------------------------------------------------------------------------|
| Laboratory animals      | Mouse C57BL/6, 6 weeks, female;<br>Rat, 6-8 weeks, female;<br>Guinea pig, 6-8 weeks, female;<br>Rabbit, 3 months, female;<br>pig, 2-3 months, female;<br>cat, 6 months for PRV infections, 4-6 weeks for FPV infections, female;<br>dog, 6 months, female.<br>The housing conditions for mice include a temperature range of 20-24°C with 40%-60% humidity, and a 12-hour light/12-hour dark cycle.                                                                                                                                                                                                                                                                                                                                                                                                                                                                                                                                                                                                                                                                                                                                                                                                                                                                                                                                                                                                                                                                                                |
| Wild animals            | For metatranscriptome sequencing, rodents, pikas and insectivorous were collected by traps. They were killed by traps. And their tissues were collected and kept in RNAlater solution (Thermo Fisher Scientific Co.). Then, these samples were placed in a biosafety transport box with dry ice, transported to a P2 laboratory, and used for metatranscriptome sequencing.<br>Bats were collected by mist nets. Then, anal swabs and faeces were collected. After that, they were released in the same region. This work is part of the "fauna of Guangdong province". So a few of them were euthanized using isoflurane and used for making specimens. For these individuals, their tissues were collected. These samples were placed in a biosafety transport box with dry ice, transported to a P2 laboratory, and used for metatranscriptome sequencing.<br>Pangolins were confiscated by Customs and the Department of Forestry of Guangdong Province. These animals were initially sent to Guangzhou wildlife rescue center. Despite exhaustive rescue efforts, all of the pangolins eventually died. Tissues were collected after they died.<br>For zoo animals, the feces were collected by the keepers. Blood and swabs were collected during physical examination of animals. While tissues were collected by veterinarians when dissecting dead animals to find the cause.<br>Scientific name of all of the animals were listed in Supplementary Data 1.xlsx. Their ages were unknown. |
| Reporting on sex        | For metatranscriptome sequencing, both male and female were collected. Samples were pooled according to species, location, and tissue for subsequent RNA extraction and library construction. The purpose of this study is to reveal the viruses carried by animals. There is no evidence that the viruses carried by females and males are different, so the gender factor is not considered.<br>For experimental infections, only females were used. There is no evidence that PRV and FPV have different pathogenicity to female and male animals. In order to reduce the number of animals used, only female animals were selected.                                                                                                                                                                                                                                                                                                                                                                                                                                                                                                                                                                                                                                                                                                                                                                                                                                                            |
| Field-collected samples | Tissues, blood, feces or pharyngeal/anal swabs were stored at -80 °C until metatranscriptome sequencing.                                                                                                                                                                                                                                                                                                                                                                                                                                                                                                                                                                                                                                                                                                                                                                                                                                                                                                                                                                                                                                                                                                                                                                                                                                                                                                                                                                                           |
| Ethics oversight        | All experimental procedures were performed in accordance with animal ethics guidelines and approved by the Animal Care and Use Committee of Longyan University (LY2022003L)                                                                                                                                                                                                                                                                                                                                                                                                                                                                                                                                                                                                                                                                                                                                                                                                                                                                                                                                                                                                                                                                                                                                                                                                                                                                                                                        |

Note that full information on the approval of the study protocol must also be provided in the manuscript.
